RESEARCH ARTICLE

# Specialized attachment structure of the fish pathogenic oomycete *Saprolegnia parasitica*

Svetlana Rezinciuc<sup>1‡</sup>, Jose Vladimir Sandoval-Sierra<sup>1</sup>, Yolanda Ruiz-León<sup>2</sup>, Pieter van West<sup>3</sup>, Javier Diéguez-Urbeondo<sup>1\*</sup>

**1** Department of Mycology, Real Jardín Botánico CSIC, Madrid, Spain, **2** UTAI, Real Jardín Botánico, CSIC, Madrid, Spain, **3** International Centre for Aquaculture Research and Development at the University of Aberdeen, Aberdeen Oomycete Laboratory, Institute of Medical Sciences, Foresterhill, Aberdeen, United Kingdom

‡ Current address: AlbaNova University Center, Royal Institute of Technology (KTH), Division of Glycoscience, Stockholm, Sweden

\* [dieguez@rjb.csic.es](mailto:dieguez@rjb.csic.es)

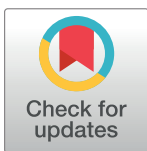

**OPEN ACCESS**

**Citation:** Rezinciuc S, Sandoval-Sierra JV, Ruiz-León Y, van West P, Diéguez-Urbeondo J (2018) Specialized attachment structure of the fish pathogenic oomycete *Saprolegnia parasitica*. PLoS ONE 13(1): e0190361. <https://doi.org/10.1371/journal.pone.0190361>

**Editor:** Mark Gijzen, Agriculture and Agri-Food Canada, CANADA

**Received:** June 12, 2017

**Accepted:** December 13, 2017

**Published:** January 17, 2018

**Copyright:** © 2018 Rezinciuc et al. This is an open access article distributed under the terms of the [Creative Commons Attribution License](https://creativecommons.org/licenses/by/4.0/), which permits unrestricted use, distribution, and reproduction in any medium, provided the original author and source are credited.

**Data Availability Statement:** All relevant data are within the paper.

**Funding:** The funding or sources of support were grants of: (1) European Union (ITN-SAPRO-238550), (2) Ministerio de Economía y Competitividad, Spain (CGL2016-80526), which supported lab-bench expenses and experiments. Moreover, Svetlana Rezinciuc and José V. Sandoval-Sierra were supported by fellowships from ITN-SAPRO-238550.

## Abstract

The secondary cysts of the fish pathogen oomycete *Saprolegnia parasitica* possess bundles of long hooked hairs that are characteristic to this economically important pathogenic species. Few studies have been carried out on elucidating their specific role in the *S. parasitica* life cycle and the role they may have in the infection process. We show here their function by employing several strategies that focus on descriptive, developmental and predictive approaches. The strength of attachment of the secondary cysts of this pathogen was compared to other closely related species where bundles of long hooked hairs are absent. We found that the attachment of the *S. parasitica* cysts was around three times stronger than that of other species. The time sequence and influence of selected factors on morphology and the number of the bundles of long hooked hairs conducted by scanning electron microscopy study revealed that these are dynamic structures. They are deployed early after encystment, *i.e.*, within 30 sec of zoospore encystment, and the length, but not the number, of the bundles steadily increased over the encystment period. We also observed that the number and length of the bundles was influenced by the type of substrate and encystment treatment applied, suggesting that these structures can adapt to different substrates (glass or fish scales) and can be modulated by different signals (*i.e.*, protein media, 50 mM CaCl<sub>2</sub> concentrations, carbon particles). Immunolocalization studies evidenced the presence of an adhesive extracellular matrix. The bioinformatic analyses of the *S. parasitica* secreted proteins showed that there is a high expression of genes encoding domains of putative proteins related to the attachment process and cell adhesion (fibronectin and thrombospondin) coinciding with the deployment stage of the bundles of long hooked hairs formation. This suggests that the bundles are structures that might contribute to the adhesion of the cysts to the host because they are composed of these adhesive proteins and/or by increasing the surface of attachment of this extracellular matrix.

**Competing interests:** The authors have declared that no competing interests exist.

## Introduction

Oomycetes are successful and widespread groups of parasites [1]. In order to colonize and parasitize, they rely on asexual motile zoospores, *i.e.*, secondary zoospores [2–4] that form secondary cysts that attach to their host prior the infection [5–8]. The ability of the oomycetes to invade a wide range of hosts such as fungi, algae, plants, invertebrates, or vertebrates, indicates that they might have adaptable mechanisms for substrate and host colonization [9–13]. Recent genome and secretome studies have shown that these mechanisms involve diverse molecules including translocated host-targeting proteins [14], degrading enzymes, such as glycosylhydrolases and proteases [15], or adhesive biopolymers [16, 17]. These adhesive compounds allow cell-substratum attachment, prevent the pathogen from removal, facilitates host-pathogen interaction and host colonization [18].

Biological attachment is based on adhesive polymers that can vary in structure and capabilities involving interactions and components with different functions [19]. In the plant pathogenic oomycetous species, *Phytophthora cinnamomi*, the adhesion of cysts to plants roots involved the secretion of high molecular weight glycoproteins by rapid exocytosis [11]. In 2005, Robold and Hardham [10], identified a potential adhesive molecule of 220-kDa protein with thrombospondin repeats [10]. In *Saprolegnia parasitica* and *Saprolegnia diclina*, the presence of an extracellular matrix was evidenced by Burr and Beakes [20]. The identification of these components represents a biochemical and genetic challenge since little results have been obtained because of the complexity of the methods and approach [12, 16, 17, 20].

In fungi, similar molecules have been described in *Colletotrichum graminicola* [21], *Erysiphe graminis* [22], *Nectria haematococca* [23]. In the attachment process, some plant pathogenic oomycetes develop specialized attachment structures named appressoria that help the host penetration and subsequent infection [24]. Apart from appressoria, the only structures that have been related to attachment in the oomycetes are the so-called hooked “hairs” or “spines” on the secondary cysts of the fish pathogen *S. parasitica* [25]. These hooked hairs seem to be unique to the genus *Saprolegnia*, and were described for the first time by Manton et al., [26] using transmission electron microscopy (TEM) and a few years later Meier and Webster [27] reported that *S. parasitica* had long bundles of these hooked hairs. All studies on hooked hairs were focused on their morphology and structure and cyst coat ornamentation in *Saprolegnia* spp. [28–35]. Thus, these studies showed that the hooked hairs of *S. parasitica* are specifically longer, over 2  $\mu\text{m}$  in length than those of other *Saprolegnia* spp. and are organized in bundles [29, 31]. These hairs appear to be rapidly synthesized during the secondary cyst stage [29]. Beakes [29] presented the overall ontogeny of encystment vesicles in several *S. parasitica* isolates. In these vesicles, the hairs seem to be deposited filled with matrix material that seems to be composed of glucose and mannose since it binds to lectin Concanavalin A [20]. Later, Beakes et al. [31] suggested that the bundles of long hooked hairs might play a role as a potential virulent factor by increasing the attachment efficiency. Their function is unclear and has been extensively debated in the literature [25]. Thus, it has been suggested that these structures assist the attachment to a substrate [27, 28].

The synchronization of *Saprolegnia* developmental stages *in vitro* [35, 36] as well as the recent sequencing of the whole *S. parasitica* genome makes it now possible to investigate secreted protein families with potential roles in virulence at different developmental stages [15]. Therefore, the main objective of this work was to elucidate the function of the bundles of long hooked hairs by: (i) comparing the strength of attachment of the secondary cysts of this pathogen with those of other closely related species that have no long hairs, (ii) understanding the time sequence of external development of these structures, and the influence of the selected

factors on the morphology and the number of bundles of long hooked hairs developed, and (iii) finally, by investigating proteins that might be produced during their formation.

## Material and methods

### Strain cultivation, sporulation, and production of cysts

The strain of *S. parasitica* (SAP0206) [37] was used in all the experiments. For microscopic studies and assessment of the strength of adhesion of the secondary cysts, the strains SAP0655 of *Saprolegnia delica* [35], and SAP1148 of *Saprolegnia anisospora* [38], from the culture collection of Real Jardín Botánico at CSIC were used. Cultures were maintained on a peptone-glucose agar (PGA) medium [39], and sporulation was performed following the protocol described by Diéguez-Uribeondo et al., [36]. Briefly, mycelia colonies were grown in 0.5 mL peptone glucose liquid media (PG-l) for 24–48 hours at 20°C. The sporulation was induced by washing the mycelia with autoclaved tap water three times and then incubated for 15 hours at 20°C to allow release of the zoospores. The secondary zoospores were collected according to Cerenius and Söderhäll [40] followed by the secondary cysts production through vigorous agitation for 30 sec at 1400 rpm, except of those experiments designed to evaluate the effect of the encystment triggers on the secondary cysts morphology.

### Scanning and transmission electron microscopy

The secondary zoospores were encysted as described above and volumes of 0.5 mL of secondary cysts suspensions were transferred onto glass cover slips (8 mm in diameter). Samples were incubated at 20°C for 70 min and fixed for 1 hour in 2% glutaraldehyde at room temperature. Fixed samples were dehydrated in alcohol series from 30 to 100% and critical point dried. Then, the secondary cysts on selected surfaces were sputter coated in a vacuum with an electrically conductive layer of gold to a thickness of approximately 80 nm. Samples were observed under a Hitachi s3000N scanning electron microscope, SEM, (Real Jardín Botánico, CSIC, Madrid, Spain) at a beam specimen angle of 45°. Accelerating voltage was 20 kV; final aperture was 200 μm.

For transmission electron microscopy, TEM, the samples of secondary cysts obtained as above were processed by using a slight modification of the method described by Beakes [29]. Thus, formvar-coated copper grids (30 mm, 200 mesh) were kept in autoclaved tap water in order to avoid drying, and then fixed in uranyl acetate 2%. The specimens were observed in a JEM-1010, Jeol transmission electron microscope (Centro Nacional de Microscopía Electronica, University of Complutense, Madrid, Spain). Accelerating voltage was 100 kV; resolution 0.3 nm.

### Evaluation of the adhesion strength of the secondary cysts

The adhesion strength of the secondary cysts was tested on selected strains of the species *S. anisospora*, *S. delica*, and *S. parasitica*. Volumes of 0.5 mL of a concentration of 10<sup>4</sup> secondary cysts/mL were placed onto glass cover slips immediately after encystment. A number of 50 independent suspensions for each species were generated for the experiment. Measurements of the strength of adhesion were performed 70 min after encystment. This allowed secondary cysts to extend their hooked hairs and to attach firmly to the surface. In order to measure the strength required to remove the secondary cysts, we followed the protocol of Letourneau et al., [41]. Briefly, coverslips (8 mm in diameter) with a monolayer of attached secondary cysts were individually vortexed in 1.5 mL Eppendorf tubes for 60 sec at 1400 rpm. The total number of secondary cysts that remained attached was counted before and after the treatment by selecting three arbitrary fields of view and using a light microscope 20x (Olympus BX51, Olympus

Optical, Japan). The adhesion strength of the secondary cysts was calculated by first obtaining the average numbers of cysts attached for each replicate (each having measurements of three arbitrary fields) before and after the treatment, and then obtaining the ratio of these averages after and before the treatment.

### Time sequence study of extracellular deployment of bundles of long hooked hairs

The length and number of bundles of long hooked hairs (from now on will be named bundles) produced by the secondary cysts of *S. parasitica* were studied in a time sequence series on fixed samples using SEM. Thus, suspensions of secondary cysts obtained as described above were transferred onto glass cover slips (8 mm in diameter). The time series were prepared by vortexing the zoospores for 30 s followed by incubations for 5, 15, 70 and 115 min. After incubations, samples were fixed and processed as described above. For measurements of the length and number of bundles, 25 randomly selected secondary cysts were taken at each treatment tested. The length and number of the bundles was measured for each cyst and the whole number and length of the 25 samples were analyzed for each selected time point. Measurements were performed using ImageJ v.1.51a software [42].

### Effect of substrate, area of contact, and encystment triggers on the length and number of bundles of long hooked hairs

To evaluate the effect of area of contact, and encystment triggers on the number and length of bundles of *S. parasitica*, the secondary cysts were obtained as described above and were transferred onto the fish scales (*Salmon salar*). In order to check the effect of an additional surface exposure of the cysts, a suspension of carbon particles was added when the secondary cysts were vortexing. For the experiment, a carbon particle solution was prepared as described in Diéguez-Urbeondo et al., [43]. In the encystment trigger experiments, the secondary cysts were obtained by adding an equal volume of peptone (PG-I), or 100 mM calcium solution ( $\text{CaCl}_2$ ) to the zoospore suspension with the concentration of  $10^4$  zoospore/ml as described by Diéguez-Urbeondo et al., [44].

In all experiments, the suspensions of secondary cysts were incubated for 70 min at 20 °C and fixed for SEM as described above. The encystment induced by vortexing followed by sample incubation on glass coverslips was used as control. To count and measure the number and the length of bundles, 25 random SEM micrographs were selected. All counts and measurements were done using ImageJ v.1.51a software [42].

### Enzyme digestions and immunolocalization of bundles of long hooked hairs and extracellular matrix

**Enzymatic treatments.** The following enzyme preparations were tried for digestion of cyst spines: (i) Peptide:N-Glycosidase F (PNGase F, from *Elizabethkingia miricola*, Sigma-Aldrich, Co. LLC, St. Louis, IL) and O-glycosidase (from *Streptococcus pneumoniae*, Sigma-Aldrich, Co. LLC, St. Louis, IL) mix for 2 hours at room temperature with a final enzyme concentration 1.25 $\mu$ /mL for enzymatic deglycolysation surface proteins; and (ii) Trypsin (from porcine pancreas, Life technologies) for spines dissociation. Trypsin digestion was performed at room temperature for 48 hours with a final enzyme concentration 25mg/mL. Suspensions of cysts *circa* 0,5mL were allowed to lay on glass slides, and were placed onto Petri dishes to prevent evaporation, and incubated for 2 hours followed by fixing step for 1 hour in 4% paraformaldehyde in phosphate buffer 25mM at pH 6. All samples were prepared in two variants on fixed and not fixed cells.



**Immunolocalization.** The cysts were treated with (1) PNGase F only or (2) mix solution of PNGase F and O-glycosidase as described above. Later anti- $\beta$ -tubulin antibodies, produced in mouse, were applied as described in [45]. Briefly, after enzymatic treatment, samples were permeabilized with 0.1% Triton-X 100 for 15 min and incubated in the presence of monoclonal anti- $\beta$ -tubulin antibodies (diluted 1: 5000) (Sigma-Aldrich, Co. LLC, St. Louis, IL), produced in mouse for 2 hours followed by a fixing step for 1 hour in 4% paraformaldehyde in PBS. Secondary cysts monolayers were washed carefully three times with PBS, before fixation in 4% paraformaldehyde/PBS for 2 hours at room temperature. The bind of primary antibody was detected using fluorescein isothiocyanate (FITC)-conjugated conjugated goat anti-mouse IgG (H+L). Secondary antibodies were used as controls under identical conditions. Subsequently, the samples were washed three times with phosphate buffer solution (PBS) and incubated with the secondary antibody (goat-anti-rabbit Alexa Fluor 488 conjugate; Invitrogen, No. A31627) according to the manufacturer's protocol. Samples were washed with PBS three times, and viewed using a Zeiss LSM 510 Meta confocal microscope with a Plan Aplanachromat x 63/1.0 water-dipping objective lens.

## Bioinformatic analyses

In order to provide the basis for the bioinformatic identification of the potential bundles components, we analyzed the *S. parasitica* strain CBS223.65 secretome generated by Broad Institute of MIT and Harvard (<https://www.broadinstitute.org>) on different life stages, *i.e.*, growing mycelium, sporulating mycelium, cysts, and germinating cysts (Jiang et al. 2013) To verify this, the predicted secretome proteins of *S. parasitica* were analyzed for the presence of signal peptide using SignalP tool (<http://www.cbs.dtu.dk/services/SignalP/>). Potential secreted proteins were selected based on presence of glycosylation sites by NetNGlyc 4.0 [46] and/or search for conserved catalytic protein domains using ScanProsite [47] database. For functional annotation of the secreted proteins, BLAST tools were used to compare the protein sequences to the NCBI (<http://www.ncbi.nlm.nih.gov/>).

## Statistical analysis

The data sets were analyzed using a Shapiro-Wilk test to assess the normal distribution of the results. One-way ANOVA analysis was used to compare: (i) the ratio of adhesion strength of secondary cysts among the *Saprolegnia* spp (ii) the length and the number of the bundles of *S. parasitica* produced at each time sequence, (iii) and the length and the number of bundles of *S. parasitica* produced when secondary cysts were exposed to additional surface and encystment triggers. ANOVA was followed by a Tukey post-hoc test to determinate significant differences among the groups. The ANOVA analyses were carried out in R v. 3.3.0 software [48].

The length of the bundles of the *S. parasitica* produced at each time point was evaluated to determinate the corresponding biological development model using four non-linear models, *i.e.*, Brody, Logistic, Von Bertalanffy, and Gompertz [49]. The best biological development model was found using the easynls R package [50] by comparing multiple non-linear models. To evaluate if the length of bundles is related to the length of anchor points (carbon particle) a linear model was used. The analysis was done using lineal model function of R v. 3.3.0 software [48]. *P*-values <0.05 were considered statistically significant.

## Results

### Scanning and transmission electron microscopy

Scanning and transmission electron microscopy studies on secondary cysts and cell walls of secondary cysts obtained from selected *Saprolegnia* species confirmed that the cysts of *S.*

*parasitica* possess bundles of long hooked hairs ( $10.14 \pm 1.40 \mu\text{m}$ ) (Fig 1A and 1D), while *S. delica* has single short hooked hairs ( $0.67 \pm 0.09 \mu\text{m}$ ) (Fig 1B and 1E), and *S. anisopora* has undecorated cysts (Fig 1C and 1F). Transmission electron micrographs of the hairs of both *S. parasitica* and *S. delica* showed presence of hooks at their tips (Fig 1D and 1E). In *S. parasitica*, these hairs were long and grouped in bundles while in *S. delica* the hairs were short and single (Fig 1D and 1E).

### Evaluation of the adhesion strength of the secondary cysts

The adhesion strength of the secondary cysts was significantly different for *S. parasitica*, *S. delica* and *S. anisopora* ( $F_2 = 1776$ ,  $p < 2e-16$ ) (Fig 2). The adhesion strength of the secondary cysts was  $0.48 \pm 0.04$  for *S. parasitica*,  $0.27 \pm 0.03$  for *S. delica*, and  $0.12 \pm 0.01$  for *S. anisopora* (Fig 2).

### Time sequence study on extracellular deployment of bundles of long hooked hairs in *S. parasitica*

The statistical analyses of SEM micrographs of bundles of *S. parasitica* revealed that their length varies and increases during the time laps study (Fig 3). Thus, the length was different at time points 5, 15, and 70–115 min ( $F_3 = 128.90$ ,  $p < 2e-16$ ) (Fig 3D and 3E). At time points 70 min and 115 min, however, the length of the bundles was not significantly different (Fig 3D and 3E). The results indicated that the length of bundles increased immediately after initiation

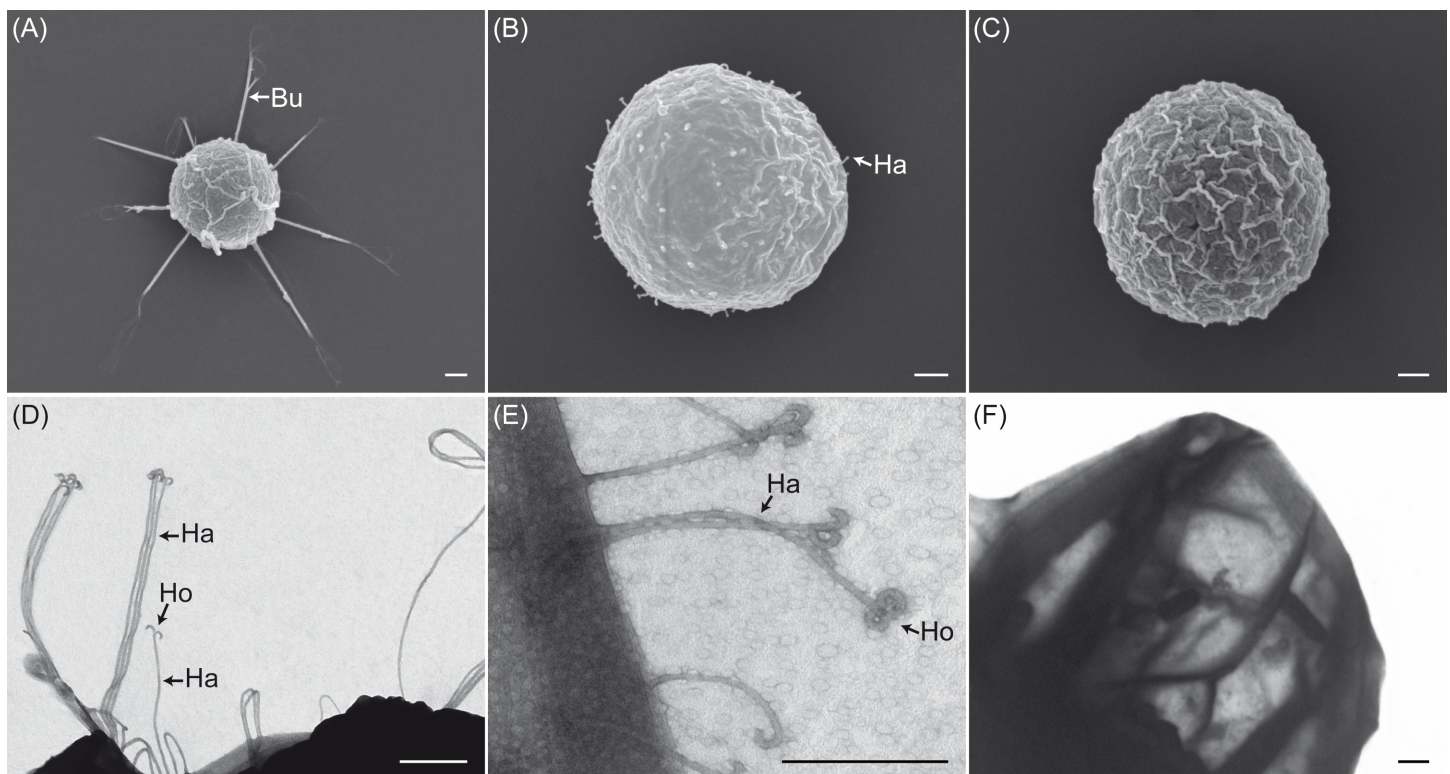

**Fig 1. Electron micrographs of secondary cysts and their cell walls from selected *Saprolegnia* species.** Scanning electron micrographs of secondary cysts of *S. parasitica* (A), *S. delica* (B), and *S. anisopora* (C) showing presence or absence of bundles (Bu) or single hairs (Ha). Transmission electron micrographs of both *S. parasitica* (D), and *S. delica* (E) confirmed the presence of hooks (Ho) at their tips and that cysts of *S. parasitica* have longer hairs (Ha) than those of *S. delica*. Cysts of *S. anisopora* do not form any hairs (F). Scale bar  $1 \mu\text{m}$ .

<https://doi.org/10.1371/journal.pone.0190361.g001>

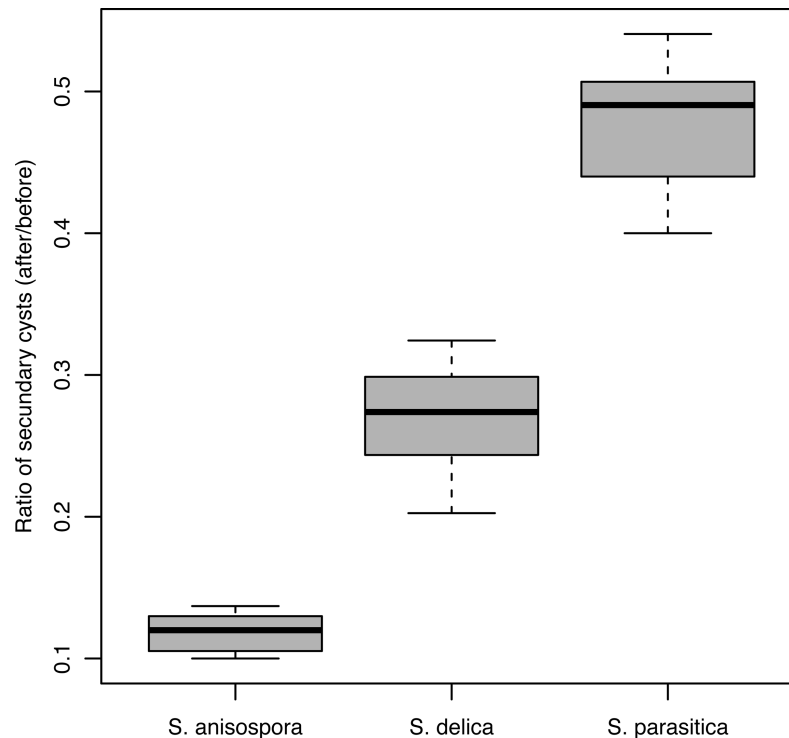

**Fig 2. Adhesion strength of the secondary cysts of selected *Saprolegnia* species.** The figure shows the ratio secondary cysts attached to glass coverslips after and before treatment in *S. parasitica*, *S. delica*, and *S. anisospora*.

<https://doi.org/10.1371/journal.pone.0190361.g002>

of the encystment, e.g., 5 min, until about 70 min after encystment following a Brody model ( $y = a * (1 - b * e^{(-c * t)})$ ),  $a = 5.97$ ,  $b = 1.10$ ,  $c = 0.06$ ; AIC = 263,30,  $R^2 = 0.85$ ) as for the number of bundles at selected time points during encystment revealed no significant differences ( $12.56 \pm 1.59$ ,  $F_3 = 1.18$ ,  $p = 0.32$ ).

The secondary cysts fixed at 5 min after encystment seemed to have initiated the unfurling of the bundles (Fig 3A). At this time after encystment, the length of bundles was on average of  $1.03 \pm 0.29 \mu\text{m}$  (Fig 3E). At time point 15 min after encystment, the bundles increased in length (Fig 3B), and were on average  $3.22 \pm 1.42 \mu\text{m}$  (Fig 3E), and in some cases adopted a loop shape (Fig 3B). At 70 and 115 min (Fig 3C), all secondary cysts showed well-extended bundles, and on average, they measured  $5.78 \pm 2.00 \mu\text{m}$ , and  $5.96 \pm 1.98 \mu\text{m}$ , respectively (Fig 3C and 3E).

### Effect of substrate, area of contact, and encystment triggers on the length and number of bundles of long hooked hairs

The length and number of the bundles on cysts of *S. parasitica* obtained by vortexing and incubated on fish scales were significantly different from those incubated on glass cover slips (Figs 4A and 4D and 6A). The length of the bundles produced on fish scales were on average  $3.15 \pm 1.87 \mu\text{m}$  and were shorter than those produced on glass slides ( $5.78 \pm 2.00 \mu\text{m}$ ) ( $F_1 = 77.39$ ,  $p < 1.8e-15$ ) (Fig 4A). In contrast, the number of bundles significantly increased on the fish scales ( $14.36 \pm 2.22$ ) compared with those incubated on glass slides ( $12.64 \pm 1.47$ ,  $F_1 = 10.47$ ,  $p = 0.002$ ) (Fig 4D).

We found that the exposure of secondary cysts suspensions to an additional surface area, i. e., carbon particles, resulted in reduction of the length of bundles induced if compared to those produced with no addition of carbon particles ( $3.35 \pm 1.54 \mu\text{m}$  versus  $5.78 \pm 2.00 \mu\text{m}$ ,  $F_1 =$

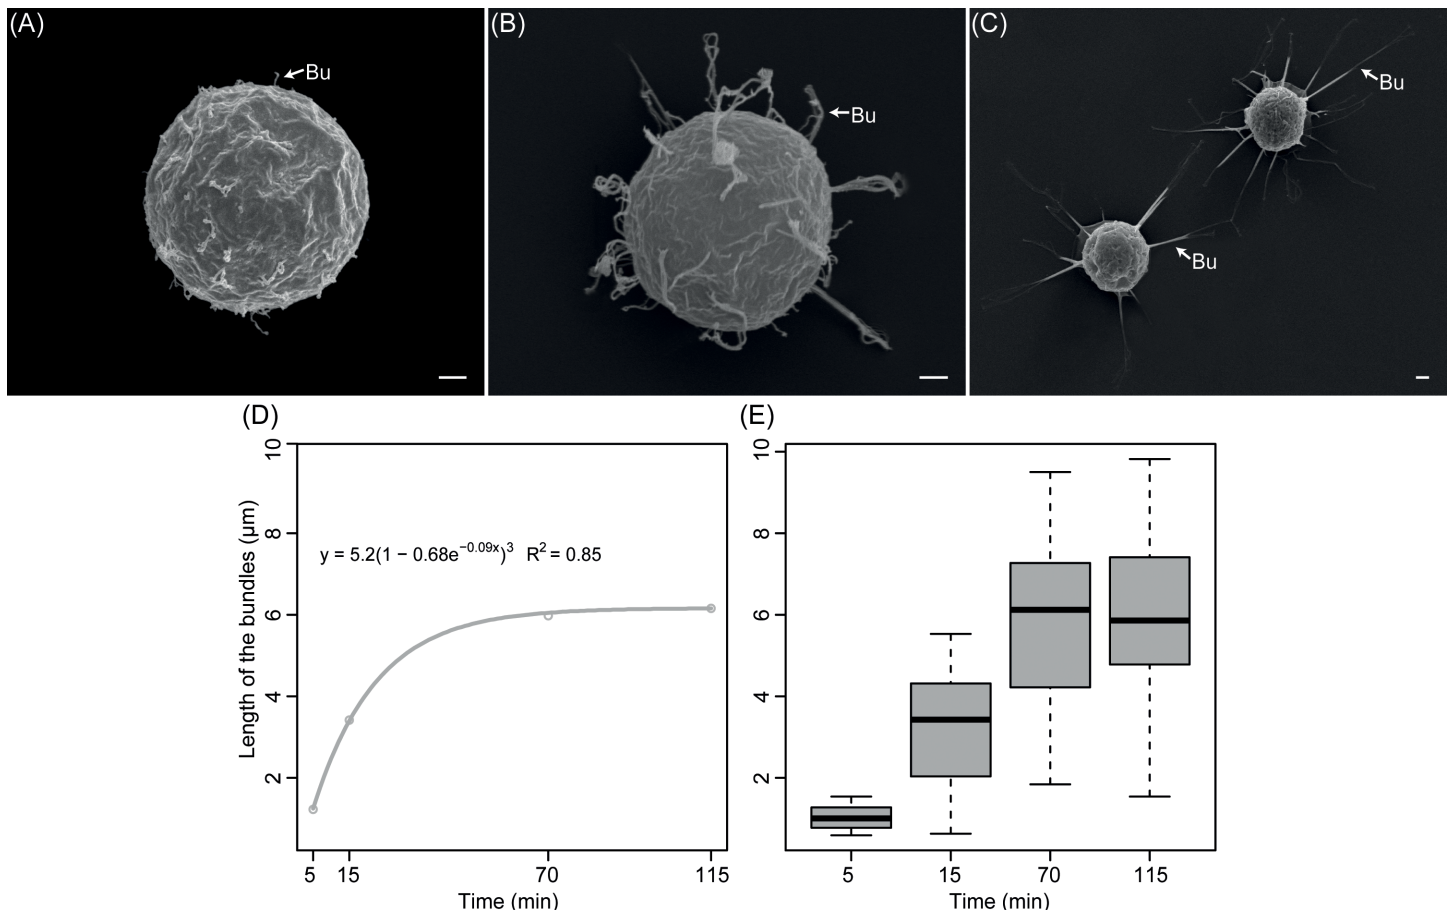

**Fig 3. Time sequence of the extracellular deployment of bundles of long hooked hairs on secondary cysts of *Saprolegnia parasitica*.** Scanning electron micrographs of the time sequence of the bundles (Bu) of long hooked hairs deployment at 5 (A), 15 (B), and 70 min (C) after encystment (scale bar 1µm). The increase in average length of the bundles of a total of 25 cysts analyzed followed a Brody a non-linear model (D) and was significantly different between selected periods except for periods 70 and 115 min after encystment (E).

<https://doi.org/10.1371/journal.pone.0190361.g003>

82.8,  $p < 2e-16$ ) (Figs 4B and 6B), while the number of bundles, however, increased ( $22.68 \pm 2.25$  versus  $12.64 \pm 1.47$ ,  $F_1 = 349.2$ ,  $p < 2e-1677.39$ ) (Fig 4E). The bundles of cysts produced in this manner, *i.e.*, carbon particles, were distributed heterogeneously on the surface of the secondary cysts, and we found that there is a correlation between the length of the bundles to the distance from the cyst surface to the carbon particles, *i.e.*, anchor points ( $F_{1,48} = 81.5$ ,  $R^2 = 0.63$ ,  $p = 6.58e-12$ ) (Fig 5).

Regarding the effect of encystment triggers on length of the bundles, the analysis showed that there are significant differences among encystment triggers ( $F_2 = 24.75$ ,  $p = 1.09e-10$ ). For example, the average length of the bundles produced by either vortexing ( $5.78 \pm 2.00$  µm) or calcium ( $5.03 \pm 2.64$  µm) was longer than that produced by using peptone as encystment trigger ( $3.71 \pm 1.87$  µm) (Tukey test:  $p = 0.063$ ; Tukey test:  $p = 2.30e-5$ , respectively) (Figs 4C and 6C and 6D). However, the average length of the bundles obtained by vortexing or using calcium was not significantly different (Tukey test:  $p = 0.063$ ) (Fig 4C).

The analysis of the number of bundles also showed significant differences among encystment triggers ( $12.64 \pm 1.47$ ,  $F_2 = 141.80$ ,  $p < 2e-16$ ). The number of bundles produced by using calcium ( $29.48 \pm 5.40$ ) or peptone ( $27.36 \pm 3.63$ ) as encystment triggers were significantly different from that produced by vortexing ( $12.64 \pm 1.47$ ) (Tukey test:  $p = 0.00$ ; Tukey test:  $p = 0.00$ ,



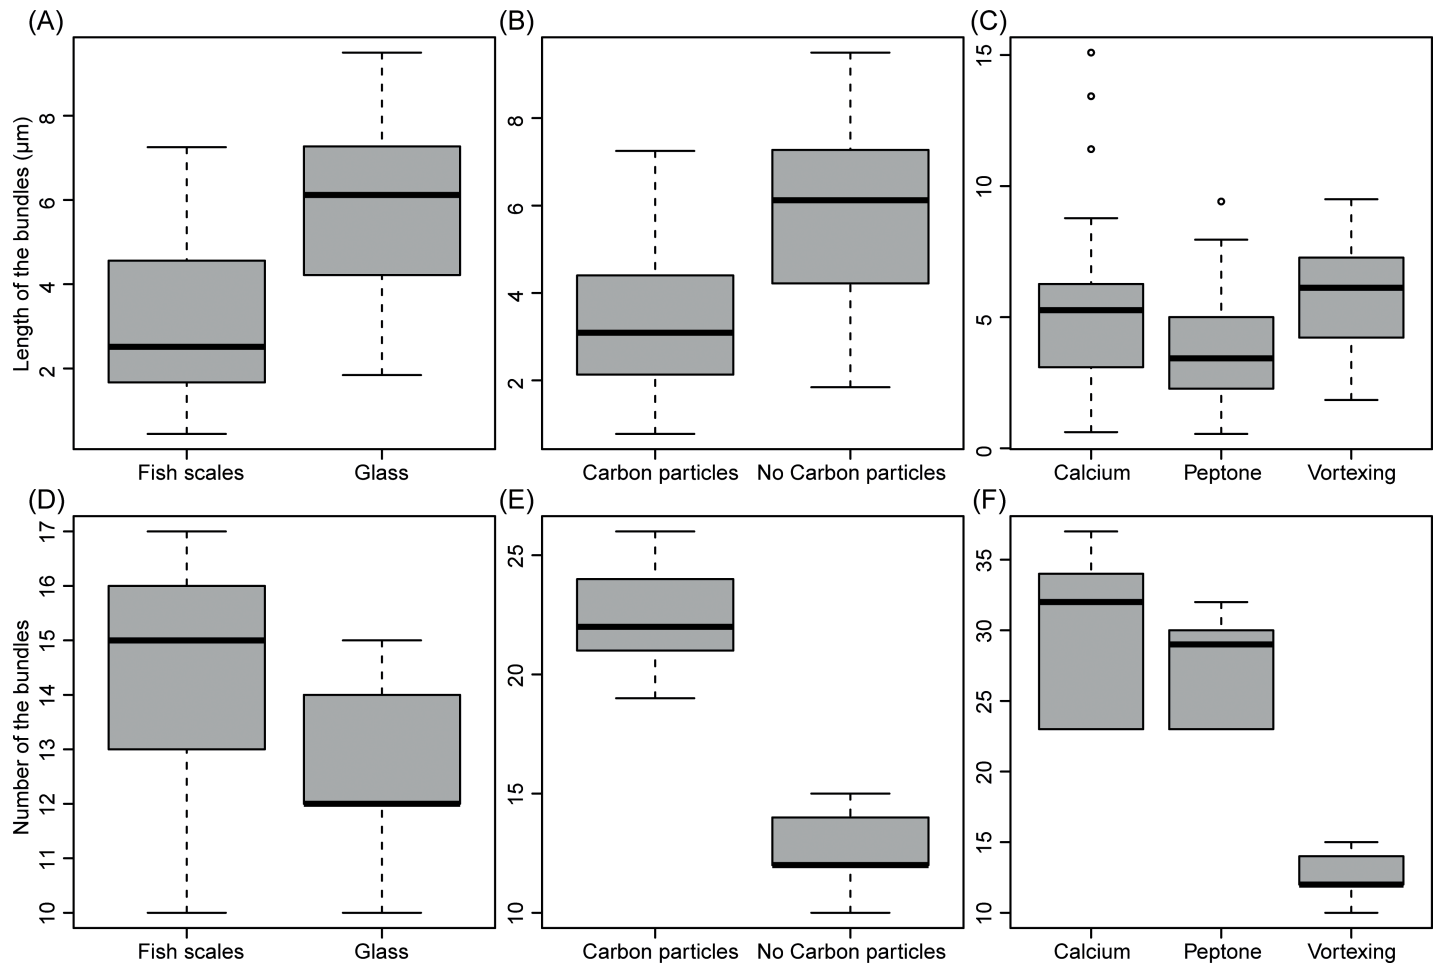

**Fig 4. Effect of substrate, area of contact and encystment triggers on the length and number of bundles of long hooked hairs of *Saprolegnia parasitica*.** The length of bundles on cysts produced by vortexing and incubated on fish scales was significantly shorter than those incubated on glass slides (A), while the number of bundles was significantly different and higher on fish scales (D). The exposure of secondary cysts to carbon particles resulted in reduction of the length (B) and an increase of the number of bundles (E). The bundles produced by either vortexing or addition of 50 mM CaCl<sub>2</sub> were significantly longer than those produced by using peptone (3g/l) (C). The number of bundles produced by using calcium or peptone treatments was higher than bundles produced by vortexing (F).

<https://doi.org/10.1371/journal.pone.0190361.g004>

respectively) (Fig 4F). However, the number of bundles on cysts of *S. parasitica* produced by calcium or peptone was not significantly different (*Tukey test*:  $p = 0.13$ ) (Fig 4F).

### Enzyme digestions and immunolocalization

The use of histochemical staining was not entirely informative for assessing spines composition due to the presence of *Saprolegnia* adhesive protein complex. This was evidenced by the unspecific binding of the antibodies (Fig 7). Therefore, the digestion with an enzymatic mix consisting of Trypsin, PNGase F, O-glycosidases was applied prior the incubation with antibodies (Fig 7). Digestions with trypsin did not result in any rupture of the hairs (Fig 7) and the anti- $\beta$ -tubulin antibody tested did not bind to the hairs.

### Bioinformatics

The data from the secretome generated by Broad Institute of MIT and Harvard (S1 Table) shows the abundance of approximately 1000 putative secreted proteins from the developmental



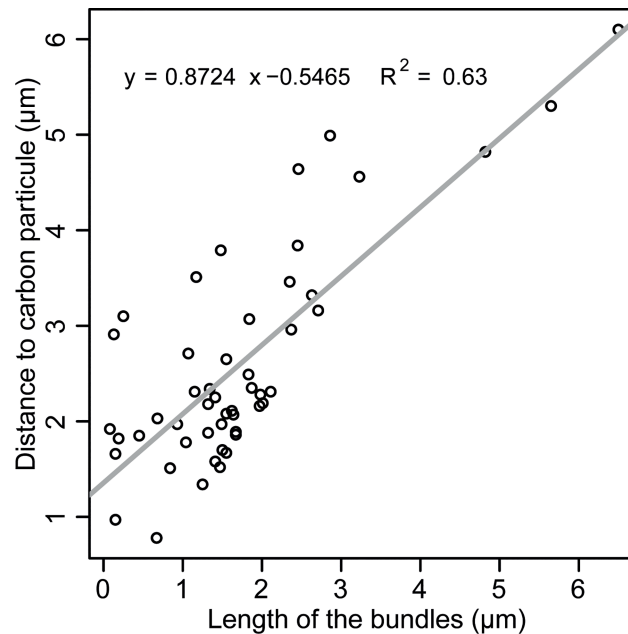

**Fig 5. Regression of the length of the bundles of long hooked hairs of *Saprolegnia parasitica* on the distance to anchor points (carbon particles).** The figure shows a significant regression of the length (µm) of the bundles produced by the cysts on the distance to carbon particles that were used as anchors points.

<https://doi.org/10.1371/journal.pone.0190361.g005>

stages: growing mycelium, sporulating mycelium, cysts, and germinating cysts. We found five putative proteins encoded by the genes SPRG\_18636, SPRG\_05384, SPRG\_19863, SPRG\_03974 and SPRG\_19320 that might be potential bundle components (Table 1). However, no functional characterization of these or their orthologues have yet been presented. According to the *S. parasitica* secretome these five putative proteins are more highly expressed in cysts than in the mycelia (Table 1). SPRG\_18636 encodes a 562 amino acid protein, SPRG\_05384 encodes a 6547 amino acid protein, SPRG\_19863 encodes a 9440 amino acid protein, SPRG\_03974 encodes a 5297 amino acid protein and SPRG\_19320 encodes a 936 amino acid protein. The predicted catalytic domain of the SPRG\_18636, SPRG\_05384, SPRG\_19863 and SPRG\_03974 contain one or more ScanProcite fibronectin III domains, and the SPRG\_19320 contains thrombospondin domain (Table 1). The NetNGlyc tool reported positive results for the amino acid sequences of the SPRG\_18636, SPRG\_05384, SPRG\_19863, SPRG\_03974 and SPRG\_19320 proteins, with 4 to 20 predicted N-glycosylated sites (Table 1).

## Discussion

The process of attachment is a key host-pathogen interaction mediator and accumulating evidence suggests that pathogenic oomycetes can release specific substances to attach to the host [17, 51, 52]. The involvement in the attachment process of specialized structures is less known. In this study, several approaches have been used to evaluate the attachment strategy of the fish pathogenic oomycete, *S. parasitica*. Thus, it has been demonstrated that the bundles of long hooked hairs of *S. parasitica* cysts are dynamic structures involved in pathogen attachment.

The strength of cyst attachment of selected *Saprolegnia* spp. appears to be correlated with the length of bundles. Thus, the strength of attachment of *S. parasitica* cysts was around three times stronger than that of cysts of two selected *Saprolegnia* spp. that have shorter or lack of hooked hairs. This might indicate that the bundles of long hooked hairs might allow a stronger

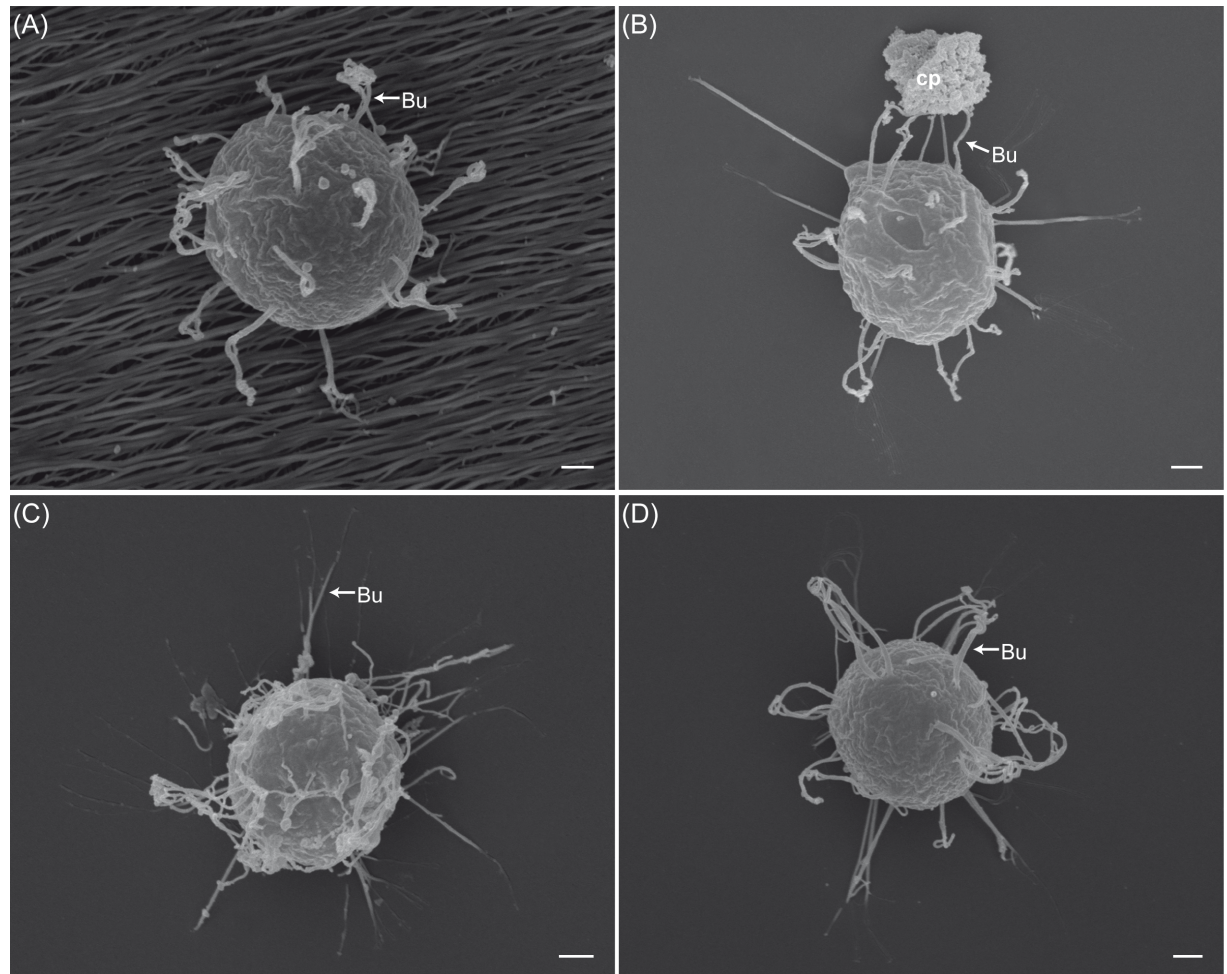

**Fig 6. Scanning electron micrographs of secondary cysts of *Saprolegnia parasitica* encysted with selected triggers.** Samples of secondary cysts were obtained by: vortexing and incubated on fish scales (A), vortexing with carbon particles (B), incubating in a 50 mM  $\text{CaCl}_2$  on glass cover slips (C), or by incubating in a peptone (3g/l) on glass cover slips (D). The bundles (Bu) of long hooked hairs were shorter on fish scales (A) than those produced by using other treatments (B, C, and D). The number of bundles increased with calcium and peptone treatments (C, D). Carbon particles (cp) seem to represent anchor points for the bundles (Bu). Scale bar 1  $\mu\text{m}$ .

<https://doi.org/10.1371/journal.pone.0190361.g006>

attachment either by themselves, or by enlarging the area of stickiness [20]. However, it cannot yet be excluded that the more efficient attachment of *S. parasitica* cysts might also be the result of different stickiness properties (*i.e.*, composition) of the cyst extracellular matrix between these three species.

In addition, the evidences found here indicate that these bundles are not passive structures for hooking to the host as proposed by Wood et al., [25]. Instead, they appear to be dynamic attaching structures that are influenced by the characteristics and nature of the attaching surface. We also showed that the deployment of these structures is modulated by both physical and chemical *stimuli* mimicking those occurring at the area of contact with the host. Thus, the bundles of hooked hairs start being arranged extracellularly as soon as 5 min after encystment, suggesting that their components are pre-synthesized before encystment as previously described by Beakes [29]. The bundles increase length but their number remains constant after undergoing either germination or the release of a new zoospore. These two developmental

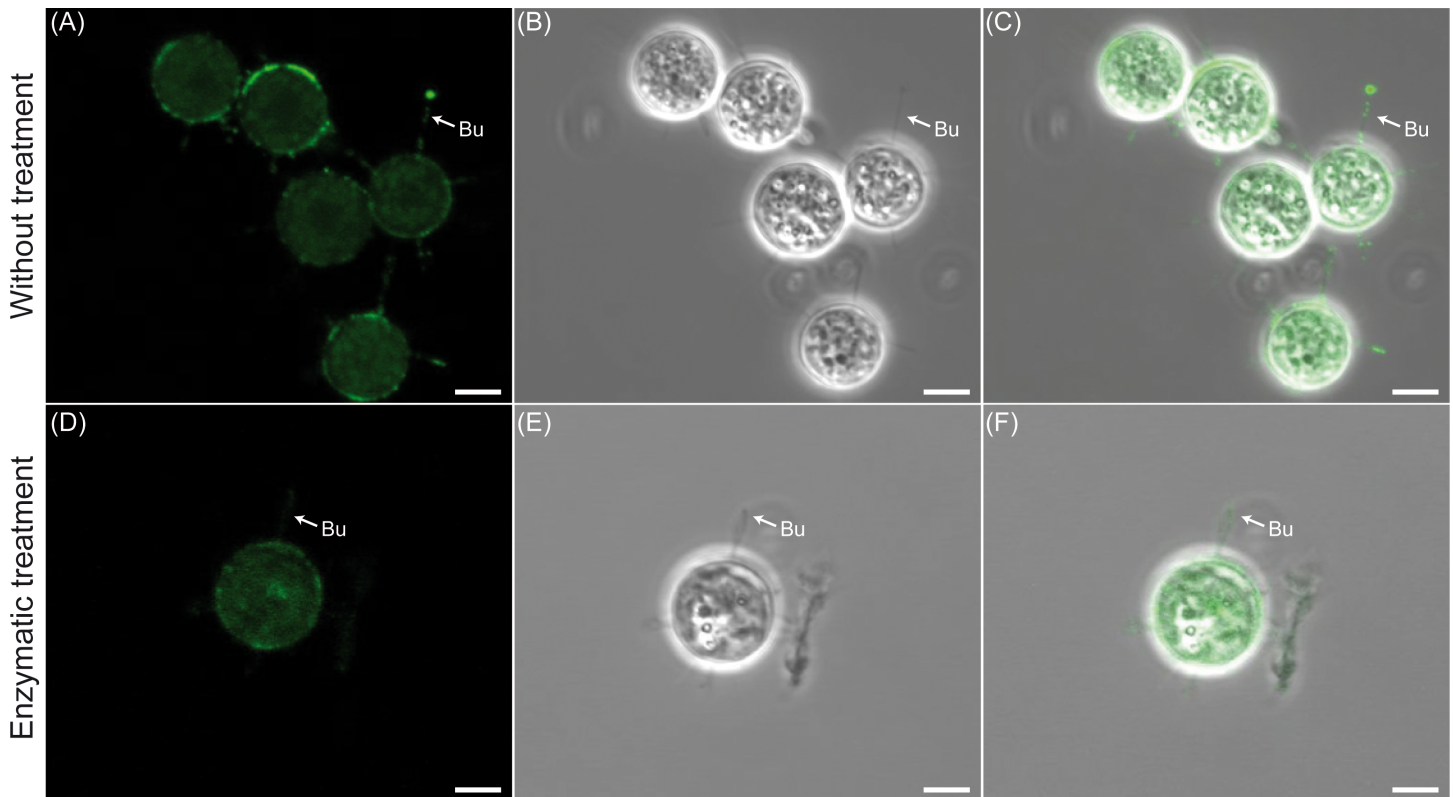

**Fig 7. Protein immunolocalization of bundles of hooked hairs of *Saprolegnia parasitica*.** The figure shows that treatment with PNGase F prevents the unspecific binding of the anti- $\beta$ -tubulin antibodies. Differential interference contrast (A and D), confocal light fluorescent (B and E) and merged micrographs (C and F) of bundles (Bu) of hooked hairs of secondary cysts. The cysts were enzymatically treated (D, E, and F) or not (A, B and C) with PNGase F, and incubated in the presence of monoclonal anti- $\beta$ -tubulin antibodies (1:5000) and goat-anti-rabbit Alexa Fluor 488 conjugate as secondary antibodies (shown in green color). Scale bar 1 $\mu$ m.

<https://doi.org/10.1371/journal.pone.0190361.g007>

stages are of key importance for the *Saprolegnia* pathogenic species since they determine the successful detection, attachment and colonization, or the formation of a new zoospore [53].

In the plant pathogen *Phytophthora* signals such as  $Ca^{2+}$  uptake or mechanical stimulation have been reported to be responsible to induce full and transient fusion of selective secretion of vesicle proteins (which likely to be an important aspect of host infection [13]). In this study, we investigated the effect of both chemical and mechanical stimuli on the length and number of bundles. Thus, it was found that these vary depending on substrate, area contact, and encystment triggers. Both the addition of nutrients (e.g., peptone) or of mechanical stimuli (e.g., carbon particles, rough surfaces) influenced the length and number of the bundles produced. The external formation of the bundles, therefore, might be receptor-mediated and calcium-dependent receptors could be involved. This is evidenced by the fact that addition of

**Table 1. List of selected secreted proteins of *Saprolegnia parasitica* with their description and expression levels in different life stages.**

| Code       | PFAM Description             | Mycelium | Sporulating mycelium | Cysts  | Germinated cysts |
|------------|------------------------------|----------|----------------------|--------|------------------|
| SPRG_18636 | Fibronectin type III domain  | 0        | 0.35                 | 1.22   | 0.30             |
| SPRG_05384 | Fibronectin type III domain  | 0.02     | 0.09                 | 8.48   | 4.68             |
| SPRG_19863 | Fibronectin type III domain  | 0.04     | 0.30                 | 4.60   | 1.84             |
| SPRG_03974 | Fibronectin type III domain  | 0.03     | 6.66                 | 16.44  | 8.30             |
| SPRG_19320 | Thrombospondin type 1 domain | 0.50     | 0.42                 | 227.72 | 88.59            |

<https://doi.org/10.1371/journal.pone.0190361.t001>

high concentration of  $\text{Ca}^{2+}$  to zoospores increased the number and affected their length throughout the surface of the cyst if compared with mechanical encystment triggers. Burr and Beakes [20], already showed that  $\text{Ca}^{2+}$  was the only ion that specifically enhanced adhesion of *S. parasitica* cyst over *S. delica*. Calcium is a non-specific signaling ion that also plays a central role in ion signaling pathways (for review see [54]) and in several important development processes of oomycetes such as encystment, adhesion and germination [55–57]. A variety of specialized structures such as those aiding ingresses of the fungal pathogen into its host, or adsorption of nutrients (appressoria, hyphodamia, haustoria, etc.) are triggered by the presence of certain ions [13, 16, 58, 59]. Furthermore, the dynamic nature of the bundles was evidenced by the fact that their length is also affected by the nature of the surface. Thus, zoospores encysted by agitation and exposed to rough surfaces, such as fish scales, or addition of carbon particles to a surface, formed twisted and curly bundles compared to those on flat surfaces such as glass slides. This might indicate that bundles of hooked hairs external formation could be also the response to mechanical *stimuli*, such as inductive surface cues, or by local accumulation of glue polymerizing agents as it occurs for other oomycetes and also fungi, *i.e.*, transglutaminases [60].

The immunolocalization studies evidenced the presence of an adhesive extracellular matrix and suggested that  $\beta$ -tubulin is not a component of the bundles. The presence of adhesive matrix on cysts of *S. parasitica* was confirmed by enzymatic digestion conducted with both N-glycosidases and O-glycosidases and is an indication of the presence of N-glycosylated glycoproteins covering the surface of the bundles. This finding suggests that this extracellular matrix is composed of N-acetyl-b-glucosaminyl and/or sialic residues as well as N-acetyl-b-d-glucosamineoligomers, which have been shown to be involved in cell attachment of other oomycetes [61].

According to RNA sequence data of the *S. parasitica* genome, genes encoding putative secreted proteins [15] are highly expressed in cysts. To verify this, a bioinformatic analysis conducted on secreted proteins specifically expressed at cyst stage [15] has revealed a high expression of putative N-glycosylated proteins with either thrombospondin or fibronectin domains in *S. parasitica*. Proteins with these domains are known to be involved in attachment [60]. A similar study conducted on the adhesion of zoospores and cysts to biological and non-biological surfaces by *P. cinnamomi* showed importance of glycoproteins in cell binding [12]. The plant pathogen *P. cinnamomi* is known to release a glycoprotein cyst coat containing N-acetyl galactosamine polysaccharides [17, 62]. Our analyses are unlikely to be sufficient to infer the components of the bundles of hooked hairs but evidence the relationship between the hairs and extracellular matrix, probably, in connection to cell attachment.

Overall, this research provides a number of microscopic, physiological, and bioinformatic evidences supporting the function of the bundles of long hooked hairs as attachment structures of the fish pathogen oomycete, *S. parasitica*. These results suggest that these structures are either composed by N-glycosylated proteins or may assist in dispersing the cyst extracellular matrix on the host surface. Further studies should focus on identifying the actual composition of the hairs by for example, selecting secreted proteins by gene disruption or gene silencing [16, 63]. This advance in genomics has opened unprecedented opportunities for *Saprolegnia* investigations. A complete identification of bundles of long hooked hairs compounds and their characterization remains a major research challenge that will help us understand composition of these attachment structures and the manner, in which the adhesion process occurs.

## Supporting information

### S1 Table. Secretome of *Saprolegnia parasitica*.

(TXT)



## Acknowledgments

The funding or sources of support were grants of: (1) European Union (ITN-SAPRO-238550), (2) Ministerio de Economía y Competitividad, Spain (CGL2016-80526). Moreover, Svetlana Rezinciuc and José V. Sandoval-Sierra were supported by fellowships from ITN-SAPRO-238550 and Ministerio de Economía y Competitividad, Spain (CGL2016-80526) partially supported lab-bench expenses and experiments.

## Author Contributions

**Conceptualization:** Svetlana Rezinciuc, Javier Diéguez-Uribeondo.

**Formal analysis:** Svetlana Rezinciuc, Jose Vladimir Sandoval-Sierra, Yolanda Ruiz-León, Pieter van West, Javier Diéguez-Uribeondo.

**Investigation:** Svetlana Rezinciuc, Jose Vladimir Sandoval-Sierra, Yolanda Ruiz-León, Pieter van West, Javier Diéguez-Uribeondo.

**Methodology:** Svetlana Rezinciuc, Jose Vladimir Sandoval-Sierra, Yolanda Ruiz-León, Pieter van West, Javier Diéguez-Uribeondo.

**Writing – original draft:** Svetlana Rezinciuc.

**Writing – review & editing:** Jose Vladimir Sandoval-Sierra, Pieter van West, Javier Diéguez-Uribeondo.

## References

1. Carris LM, Little CR, Stiles CM. Introduction to Fungi. The Plant Health Instructor. Washington State University, Kansas State University, and Georgia Military College; 2012.
2. Kim KS, Judelson HS. Sporangium-Specific Gene Expression in the Oomycete Phytopathogen *Phytophthora infestans*. Eukaryot Cell. 2003; 2(6):1376–85. <https://doi.org/10.1128/EC.2.6.1376-1385.2003> PMID: 14665470
3. Walker CA, van West P. Zoospore development in the oomycetes. Fungal Biol Rev. 2007; 21(1):10–8. <http://dx.doi.org/10.1016/j.fbr.2007.02.001>.
4. Xiang Q, Kim KS, Roy S, Judelson HS. A motif within a complex promoter from the oomycete *Phytophthora infestans* determines transcription during an intermediate stage of sporulation. Fungal Genet Biol. 2009; 46(5):400–9. <http://dx.doi.org/10.1016/j.fgb.2009.02.006>. <https://doi.org/10.1016/j.fgb.2009.02.006> PMID: 19250972
5. Cerenius L, Söderhäll K. Repeated zoospore emergence as a possible adaptation to parasitism in *Aphanomyces*. Exp Mycol. 1985; 9(3):9–63. [http://dx.doi.org/10.1016/0147-5975\(85\)90022-2](http://dx.doi.org/10.1016/0147-5975(85)90022-2).
6. Rand TG, Munden D. Chemotaxis of Zoospores of Two Fish-Egg-Pathogenic Strains of *Saprolegnia diclina* (Oomycotina: Saprolegniaceae) toward Salmonid Egg Chorion Extracts and Selected Amino Acids and Sugars. Journal of Aquatic Animal Health. 1993; 5(4):240–5. [https://doi.org/10.1577/1548-8667\(1993\)005<0240:COZOTF>2.3.CO;2](https://doi.org/10.1577/1548-8667(1993)005<0240:COZOTF>2.3.CO;2)
7. Raftoyannis Y, Dick MW. Zoospore encystment and pathogenicity of *Phytophthora* and *Pythium* species on plant roots. Microbiol Res. 2006; 161(1):1–8. <http://dx.doi.org/10.1016/j.micres.2005.04.003>. <https://doi.org/10.1016/j.micres.2005.04.003> PMID: 16338584
8. Deacon JW, Saxena G. Germination triggers of zoospore cysts of *Aphanomyces euteiches* and *Phytophthora parasitica*. Mycol Res. 1998; 102(1):33–41. <http://dx.doi.org/10.1017/S0953756297004358>.
9. Donaldson SP, Deacon JW. Role of calcium in adhesion and germination of zoospore cysts of *Pythium*: a model to explain infection of host plants. Microbiology. 1992; 138(10):2051–9. <https://doi.org/10.1099/00221287-138-10-2051>
10. Robold AV, Hardham AR. During attachment *Phytophthora* spores secrete proteins containing thrombospondin type 1 repeats. Curr Genet. 2005; 47(5):307–15. <https://doi.org/10.1007/s00294-004-0559-8> PMID: 15815927
11. Gubler F, Hardham AR. Secretion of adhesive material during encystment of *Phytophthora cinnamomi* zoospores, characterized by immunogold labelling with monoclonal antibodies to components of peripheral vesicles. J Cell Sci. 1988; 90(2):225.



12. Gubler F, Hardham AR, Duniec J. Characterising adhesiveness of *Phytophthora cinnamomi* zoospores during encystment. *Protoplasma*. 1989; 149(1):24–30. <https://doi.org/10.1007/bf01623979>
13. Zhang W, Blackman LM, Hardham AR. Transient fusion and selective secretion of vesicle proteins in *Phytophthora nicotianae* zoospores. *PeerJ*. 2013; 1:e221. <https://doi.org/10.7717/peerj.221> PMID: 24392285
14. Wawra S, Bain J, Durward E, de Bruijn I, Minor KL, Matena A, et al. Host-targeting protein 1 (SpHtp1) from the oomycete *Saprolegnia parasitica* translocates specifically into fish cells in a tyrosine-O-sulphate-dependent manner. *Proceedings of the National Academy of Sciences*. 2012; 109(6):2096–101. <https://doi.org/10.1073/pnas.1113775109> PMID: 22308362
15. Jiang RHY, de Bruijn I, Haas BJ, Belmonte R, Löbach L, Christie J, et al. Distinctive expansion of potential virulence genes in the genome of the oomycete fish pathogen *Saprolegnia parasitica*. *PLoS Genetics*. 2013; 9(6):e1003272. <https://doi.org/10.1371/journal.pgen.1003272> PMID: 23785293
16. Epstein L, Nicholson R. Adhesion and adhesives of Fungi and Oomycetes. In: Smith A, Callow J, editors. *Biological Adhesives*: Springer Berlin Heidelberg; 2006. p. 41–62.
17. Hardham AR. Cell Biology of Fungal Infection of Plants. In: Howard RJ, Gow NAR, editors. *Biology of the Fungal Cell*. Berlin, Heidelberg: Springer Berlin Heidelberg; 2001. p. 91–123.
18. Bechinger C, Giebel K-F, Schnell M, Leiderer P, Deising HB, Bastmeyer M. Optical Measurements of Invasive Forces Exerted by Appressoria of a Plant Pathogenic Fungus. *Science*. 1999; 285(5435):1896–9. <https://doi.org/10.1126/science.285.5435.1896> PMID: 10489364
19. Fabritius A-L, Judelson HS. A Mating-Induced Protein of *Phytophthora infestans* Is a Member of a Family of Elicitors with Divergent Structures and Stage-Specific Patterns of Expression. *Molecular Plant-Microbe Interactions*. 2003; 16(10):926–35. <https://doi.org/10.1094/MPMI.2003.16.10.926> PMID: 14558694
20. Burr AW, Beakes GW. Characterization of zoospore and cyst surface structure in saprophytic and fish pathogenic *Saprolegnia* species (Oomycete fungal protists). *Protoplasma*. 1994; 181(1–4):142–63. <https://doi.org/10.1007/BF01666393>
21. Mercure EW, Leite B, Nicholson RL. Adhesion of ungerminated conidia of *Colletotrichum graminicola* to artificial hydrophobic surfaces. *Physiological and Molecular Plant Pathology*. 1994; 45(6):421–40. [http://dx.doi.org/10.1016/S0885-5765\(05\)80040-2](http://dx.doi.org/10.1016/S0885-5765(05)80040-2).
22. Kunoh H, Yamaoka N, Yoshioka H, Nicholson RL. Preparation of the infection court by *Erysiphe graminis*. *Exp Mycol*. 1988; 12(4):325–35. [http://dx.doi.org/10.1016/0147-5975\(88\)90024-2](http://dx.doi.org/10.1016/0147-5975(88)90024-2).
23. Jones MJ, Epstein L. Adhesion of Macroconidia to the Plant Surface and Virulence of *Nectria haematococca*. *Appl Environ Microbiol*. 1990; 56(12):3772–8. PMID: 16348379
24. Grenville-Briggs LJ, Anderson VL, Fugelstad J, Avrova AO, Bouzenzana J, Williams A, et al. Cellulose synthesis in *Phytophthora infestans* is required for normal appressorium formation and successful infection of potato. *The Plant Cell Online*. 2008; 20(3):720–38. <https://doi.org/10.1105/tpc.107.052043> PMID: 18349153
25. Wood SE, Willoughby LG, Beakes GW. Experimental studies on uptake and interaction of spores of the *Saprolegnia diclina-parasitica* complex with external mucus of brown trout (*Salmo trutta*). *Transactions of the British Mycological Society*. 1988; 90(1):63–73. [http://dx.doi.org/10.1016/S0007-1536\(88\)80181-5](http://dx.doi.org/10.1016/S0007-1536(88)80181-5).
26. Manton I, Clarke B, Greenwood AD. Observations with the electron microscope on a species of *Saprolegnia*. *Journal of Experimental Botany*. 1951; 2(3):321–31. <https://doi.org/10.1093/jxb/2.3.321>
27. Meier H, Webster J. An electron microscope study of cysts in the Saprolegniaceae. *Journal of Experimental Botany*. 1954; 5(3):401–9. <https://doi.org/10.1093/jxb/5.3.401>
28. Pickering AD, Willoughby LG, McGrory CB. Fine structure of secondary zoospore cyst cases of *Saprolegnia* isolates from infected fish. *Transactions of the British Mycological Society*. 1979; 72(3):427–36. [http://dx.doi.org/10.1016/S0007-1536\(79\)80150-3](http://dx.doi.org/10.1016/S0007-1536(79)80150-3).
29. Beakes GW. A comparative account of cyst coat ontogeny in saprophytic and fish-lesion (pathogenic) isolates of the *Saprolegnia diclina-parasitica* complex. *Canadian Journal of Botany*. 1983; 61(2):603–25. <https://doi.org/10.1139/b83-068>
30. Beakes GW, Ford H. Esterase isoenzyme variation in the genus *Saprolegnia*, with particular reference to the fish-pathogenic *S. diclina-parasitica* complex. *Journal of General Microbiology*. 1983; 129(8):2605–19. <https://doi.org/10.1099/00221287-129-8-2605> PMID: 6631417
31. Beakes GW, Wood SE, Burr AW. Features which characterize *Saprolegnia* isolates from salmon fish lesions—a review. In: Mueller GJ, editor. *Salmon Saprolegniasis*. Portland, Oregon: Report to Bonneville Power Administration. Environment, Fish and Wildlife Division; 1994. p. 33–66.

32. Stueland S, Hatai K, Skaar I. Morphological and physiological characteristics of *Saprolegnia* spp. strains pathogenic to Atlantic salmon, *Salmo salar* L. J Fish Dis. 2005; 28(8):445–53. <https://doi.org/10.1111/j.1365-2761.2005.00635.x> PMID: 16159362
33. Mueller GJ, Whisler HC. Fungal parasites of Salmon from the Columbia River Watershed. In: Mueller GJ, editor. Salmon Saprolegniasis. Portland, Oregon: Report to Bonneville Power Administration. Environment, Fish and Wildlife Division; 1994. p. 163–88.
34. Fregeneda-Grandes JM, Rodríguez-Cadenas F, Aller-Gancedo JM. Fungi isolated from cultured eggs, alevins and broodfish of brown trout in a hatchery affected by saprolegniasis. Journal of Fish Biology. 2007; 71(2):510–8. <https://doi.org/10.1111/j.1095-8649.2007.01510.x>
35. Diéguez-Urbeondo J, Fregeneda-Grandes JM, Cerenius L, Pérez-Iniesta E, Aller-Gancedo JM, Tellería MT, et al. Re-evaluation of the enigmatic species complex *Saprolegnia diclina*-*Saprolegnia parasitica* based on morphological, physiological and molecular data. Fungal Genet Biol. 2007; 44:585–601. <https://doi.org/10.1016/j.fgb.2007.02.010> PMID: 17446097
36. Diéguez-Urbeondo J, Cerenius L, Söderhäll K. Repeated zoospore emergence in *Saprolegnia parasitica*. Mycol Res. 1994; 98(7):810–5.
37. Söderhäll K, Dick MW, Clark G, Fürst M, Constantinescu O. Isolation of *Saprolegnia parasitica* from the crayfish *Astacus leptodactylus*. Aquaculture. 1991; 92(0):121–5. [http://dx.doi.org/10.1016/0044-8486\(91\)90014-X](http://dx.doi.org/10.1016/0044-8486(91)90014-X).
38. Sandoval-Sierra JV, Martín MP, Diéguez-Urbeondo J. Species identification in the genus *Saprolegnia* (Oomycetes): defining DNA-based molecular operational taxonomic units. Fungal Biol. 2014; 118:559–78. <https://doi.org/10.1016/j.funbio.2013.10.005> PMID: 25088071
39. Unestam T. Studies on the crayfish plague fungus *Aphanomyces astaci*. Some factors affecting growth in vitro. Physiologia Plantarum. 1965; 18(2):483–505. <https://doi.org/10.1111/j.1399-3054.1965.tb06911.x>
40. Cerenius L, Söderhäll K. Chemotaxis in *Aphanomyces astaci*, an arthropod-parasitic fungus. J Invertebr Pathol. 1984; 43(2):278–81. [http://dx.doi.org/10.1016/0022-2011\(84\)90150-2](http://dx.doi.org/10.1016/0022-2011(84)90150-2).
41. Letourneau J, Levesque C, Berthiaume F, Jacques M, Mourez M. In vitro assay of bacterial adhesion onto mammalian epithelial cells. Journal of Visualized Experiments. 2011; 51:1–4.
42. Schneider CA, Rasband WS, Eliceiri KW. NIH Image to ImageJ: 25 years of image analysis. Nat Methods. 2012; 9:671–5. <https://doi.org/10.1038/nmeth.2089> PMID: 22930834
43. Diéguez-Urbeondo J, Gierz G, Bartnicki-García S. Image analysis of hyphal morphogenesis in Saprolegniaceae (Oomycetes). Fungal Genet Biol. 2004; 41(3):293–307. <http://dx.doi.org/10.1016/j.fgb.2003.10.012>. <https://doi.org/10.1016/j.fgb.2003.10.012> PMID: 14761790
44. Diéguez-Urbeondo J, Cerenius L, Söderhäll K. *Saprolegnia parasitica* and its virulence on three different species of freshwater crayfish. Aquaculture. 1994; 120(3):219–28. [https://doi.org/10.1016/0044-8486\(94\)90080-9](https://doi.org/10.1016/0044-8486(94)90080-9)
45. Van West P, De Bruijn I, Minor KL, Phillips AJ, Robertson EJ, Wawra S, et al. The putative RxLR effector protein SpHtp1 from the fish pathogenic oomycete *Saprolegnia parasitica* is translocated into fish cells. FEMS Microbiol Lett. 2010; 310(2):127–37. <https://doi.org/10.1111/j.1574-6968.2010.02055.x> PMID: 20659163
46. Steentoft C, Vakhrushev SY, Joshi HJ, Kong Y, Vester-Christensen MB, Schjoldager KTBG, et al. Precision mapping of the human O-GalNAc glycoproteome through SimpleCell technology. The EMBO Journal. 2013; 32(10):1478–88. doi: 10.1038/emboj.2013.79. PMID: 23584533
47. Sigrist CJA, de Castro E, Cerutti L, Cuče BA, Hulo N, Bridge A, et al. New and continuing developments at PROSITE. Nucleic Acids Res. 2013; 41(D1):D344–D7. <https://doi.org/10.1093/nar/gks1067> PMID: 23161676
48. R Development Core Team. R: A language and environment for statistical computing. Vienna, Austria: R Foundation for Statistical Computing; 2017.
49. Koya PR, Goshu AT. Generalized Mathematical Model for Biological Growths. Open Journal of Modeling and Simulation. 2013; Vol.01No. 04:12. <https://doi.org/10.4236/ojmsi.2013.14008>
50. Arnhold E. easylnls: Easy nonlinear model. R package version 4.0; 2015.
51. Mendgen K, Hahn M, Deising H. Morphogenesis and Mechanisms of Penetration by Plant Pathogenic Fungi. Annu Rev Phytopathol. 1996; 34(1):367–86. <https://doi.org/10.1146/annurev.phyto.34.1.367> PMID: 15012548
52. Epstein L, Nicholson RL. Adhesion of Spores and Hyphae to Plant Surfaces. In: Carroll GC, Tudzynski P, editors. Plant Relationships: Part A. Berlin, Heidelberg: Springer Berlin Heidelberg; 1997. p. 11–25.
53. Andersson MG, Cerenius L. Pumilio homologue from *Saprolegnia parasitica* specifically expressed in undifferentiated spore cysts. Eukaryot Cell. 2002; 1(1):105–11. <https://doi.org/10.1128/EC.1.1.105-111.2002> PMID: 12455976

54. Shaw BD, Hoch HC. Ions Regulate Spore Attachment, Germination, and Fungal Growth. In: Howard RJ, Gow NAR, editors. *Biology of the Fungal Cell*. Berlin, Heidelberg: Springer Berlin Heidelberg; 2007. p. 219–36.
55. Deacon JW, Donaldson SP. Molecular recognition in the homing responses of zoospore fungi, with special reference to *Pythium* and *Phytophthora*. *Mycol Res*. 1993; 97(10):1153–71. [http://dx.doi.org/10.1016/S0953-7562\(09\)81278-1](http://dx.doi.org/10.1016/S0953-7562(09)81278-1).
56. Reid B, Morris BM, Gow NAR. Calcium-Dependent, Genus-Specific, Autoaggregation of Zoospores of Phytopathogenic Fungi. *Exp Mycol*. 1995; 19(3):202–13. <http://dx.doi.org/10.1006/emyc.1995.1025>.
57. Brazeo NJ, Lindner DL, Fraver S, D'Amato AW, Milo AM. Wood-inhabiting, polyporoid fungi in aspen-dominated forests managed for biomass in the U.S. Lake States. *Fungal Ecol*. 2012; 5(5):600–9. <http://dx.doi.org/10.1016/j.funeco.2012.03.002>.
58. Takano Y, Kikuchi T, Kubo Y, Hamer JE, Mise K, Furusawa I. The *Colletotrichum lagenarium* MAP Kinase Gene CMK1 Regulates Diverse Aspects of Fungal Pathogenesis. *Molecular Plant-Microbe Interactions*. 2000; 13(4):374–83. <https://doi.org/10.1094/MPMI.2000.13.4.374> PMID: 10755300
59. Yamaoka N, Takeuchi Y. Morphogenesis of the powdery mildew fungus in water (4) The significance of conidium adhesion to the substratum for normal appressorium development in water. *Physiological and Molecular Plant Pathology*. 1999; 54(5):145–54. <http://dx.doi.org/10.1006/pmpp.1998.0194>.
60. Smith AM, Callow JA, editors. *Biological Adhesives*. Berlin: Springer Berlin Heidelberg; 2006.
61. Prieto AL, Andersson-Fisone C, Crossin KL. Characterization of multiple adhesive and counteradhesive domains in the extracellular matrix protein cytotactin. *The Journal of Cell Biology*. 1992; 119(3):663. PMID: 1383239
62. Hardham AR, Suzuki E. Glycoconjugates on the surface of spores of the pathogenic fungus *Phytophthora cinnamomi* studied using fluorescence and electron microscopy and flow cytometry. *Can J Microbiol*. 1990; 36(3):183–92. <https://doi.org/10.1139/m90-032>
63. Saraiva M, de Bruijn I, Grenville-Briggs L, McLaggan D, Willems A, Bulone V, et al. Functional characterization of a tyrosinase gene from the oomycete *Saprolegnia parasitica* by RNAi silencing. *Fungal Biol*. 2014; 118(7):621–9. <http://dx.doi.org/10.1016/j.funbio.2014.01.011>. <https://doi.org/10.1016/j.funbio.2014.01.011> PMID: 25088076
